# Supplementary material
Source: Springer Nature journal article supplement (https://www.springermedizin.de/resource/supplementary/12936_2013_3299_MOESM1_ESM.pdf/9545568)
Supplement: MOESM1 [file 9545568]

Day 0- screening of potential patients.  
Inclusion and exclusion criteria

```
graph TD; A[Day 0- screening of potential patients. Inclusion and exclusion criteria] --> B[Fail Inclusion criteria]; A --> C[Pass Inclusion criteria]; B --> D[Excluded from the study]; C --> E[Patients visited at home on Day-3; i. Interview ii. Pill counts iii. Blood slides for malaria parasites iv. Axillary Temperature measured]; E --> F[Day-7 Follow up visit at the dispensary; i. Blood samples taken for lumefantrine concs ii. Blood slides for malaria parasites taken iii. Axillary Temperature measured];
```

Fail Inclusion criteria

Pass Inclusion criteria

Excluded from the study

Patients visited at home on Day-3;

- i. Interview
- ii. Pill counts
- iii. Blood slides for malaria parasites
- iv. Axillary Temperature measured

Day-7 Follow up visit at the dispensary;

- i. Blood samples taken for lumefantrine concs
- ii. Blood slides for malaria parasites taken
- iii. Axillary Temperature measured
